# Supplementary material for: Lithium-rich Li1.2Ni0.13Co0.13Mn0.54O2 oxide coated by Li3PO4 and carbon nanocomposite layers as high performance cathode materials for lithium ion batteries
Source: Royal Society of Chemistry journal article supplement (doi:10.1039/c4ta04823g), 2014-12-03
Supplement: c4ta04823g1.pdf [file c4ta04823g1.pdf]

Electronic Supplementary Material (ESI) for Journal of Materials Chemistry A  
This journal is © The Royal Society of Chemistry 2014

## Supporting Information

### **Lithium-Rich $\text{Li}_{1.2}\text{Ni}_{0.13}\text{Co}_{0.13}\text{Mn}_{0.54}\text{O}_2$ Oxide Coated by $\text{Li}_3\text{PO}_4$ and Carbon Nanocomposite Layer as a High Performance Cathode Material for Lithium Ion Batteries**

Hui Liu,<sup>a</sup> Cheng Chen,<sup>a</sup> Chunyu Du,<sup>\*a</sup> Xiaoshu He,<sup>a</sup> Geping Yin,<sup>a</sup> Bai Song,<sup>b</sup> Pengjian Zuo,<sup>a</sup> Xinqun Cheng,<sup>a</sup> Yulin Ma<sup>a</sup> and Yunzhi Gao<sup>a</sup>

<sup>a</sup> School of Chemical Engineering and Technology, Harbin Institute of Technology  
Harbin, 150001, China. E-mail: [cydu@hit.edu.cn](mailto:cydu@hit.edu.cn)

<sup>b</sup> Harbin Coslight Power Co., Ltd., No.8 Taihu South Street, Harbin, 150060, China.

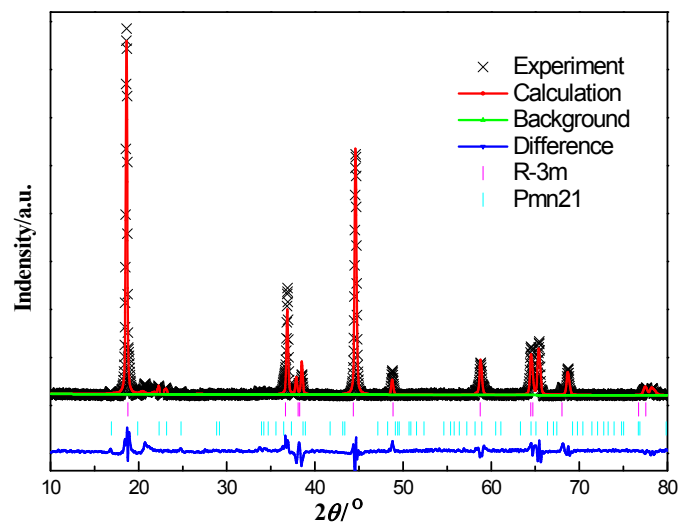

**Fig. S1** XRD pattern of the LNCMO@Li<sub>3</sub>PO<sub>4</sub>/C sample and the Rietveld refinement result.

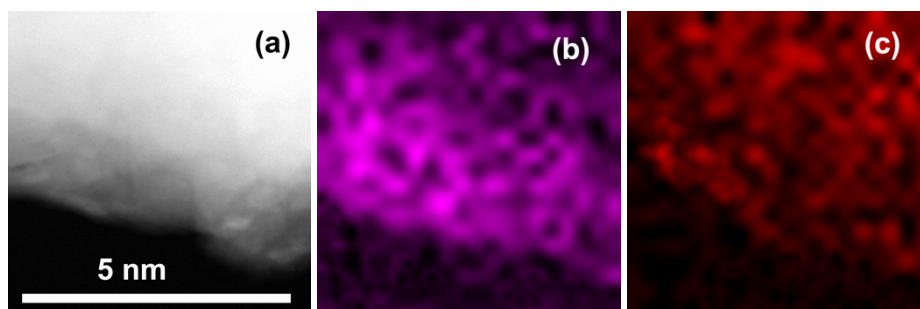

**Fig. S2** TEM image (a) and EDX mapping of carbon (b) and phosphorus (c) elements for the LNCMO@Li<sub>3</sub>PO<sub>4</sub>/C material.
